# Supplementary material for: Structure–activity & structure–toxicity relationship study of salinomycin diastereoisomers and their benzoylated derivatives
Source: Royal Society of Chemistry journal article supplement (doi:10.1039/c5ob02303c), 2016-01-01
Supplement: c5ob02303c1.pdf [file c5ob02303c1.pdf]

## Supplementary information

1.  $^1\text{H}$  NMR and  $^{13}\text{C}$  NMR of 2,3,4,5,8,9,10
2. Crystal Data of 9
3. Dose-response curves

intermediate 8

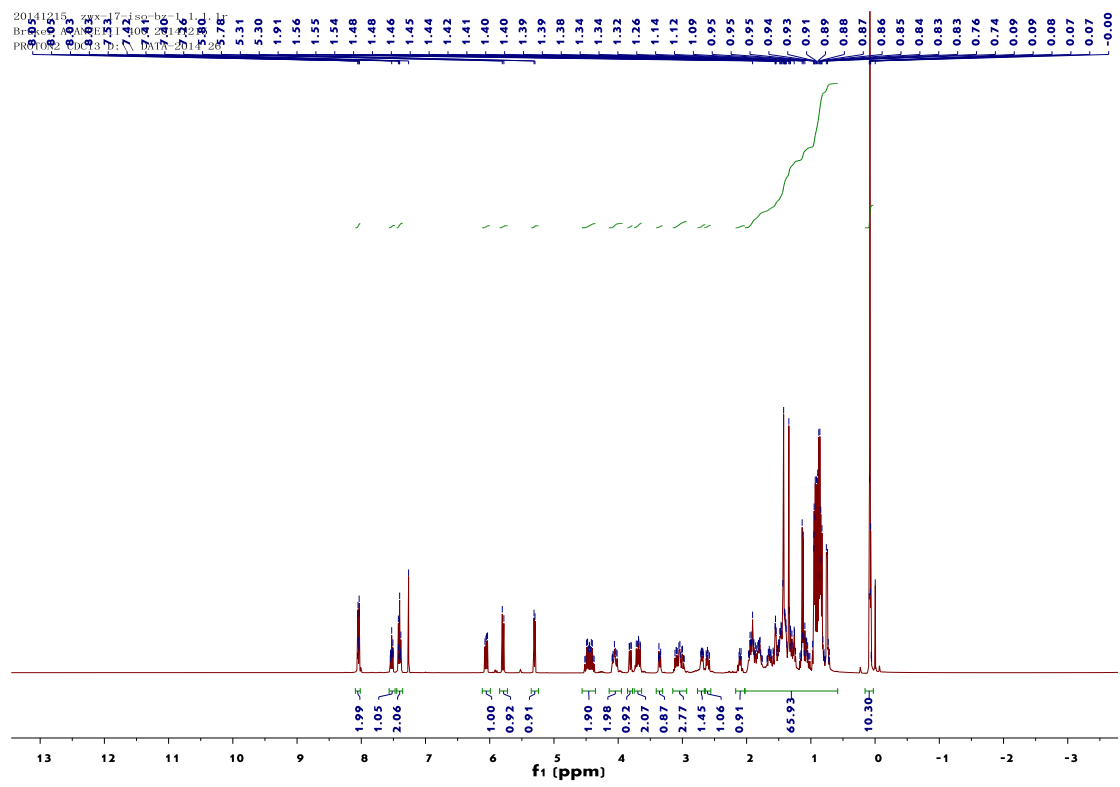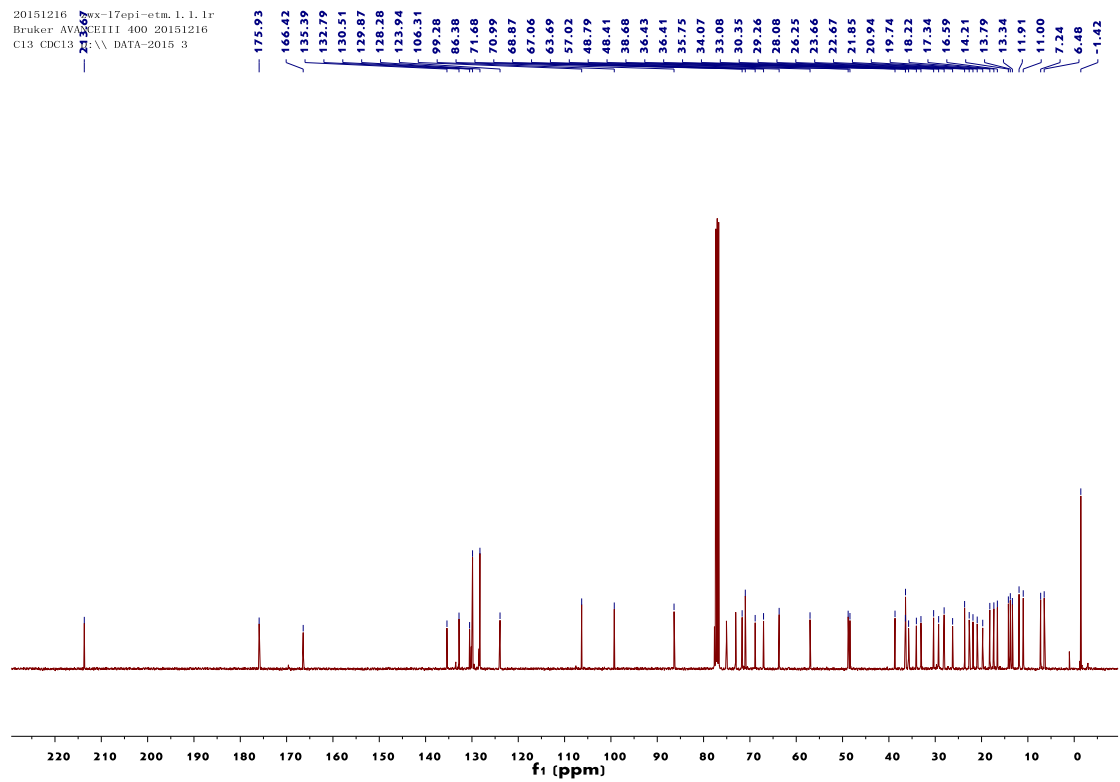

intermediate 9

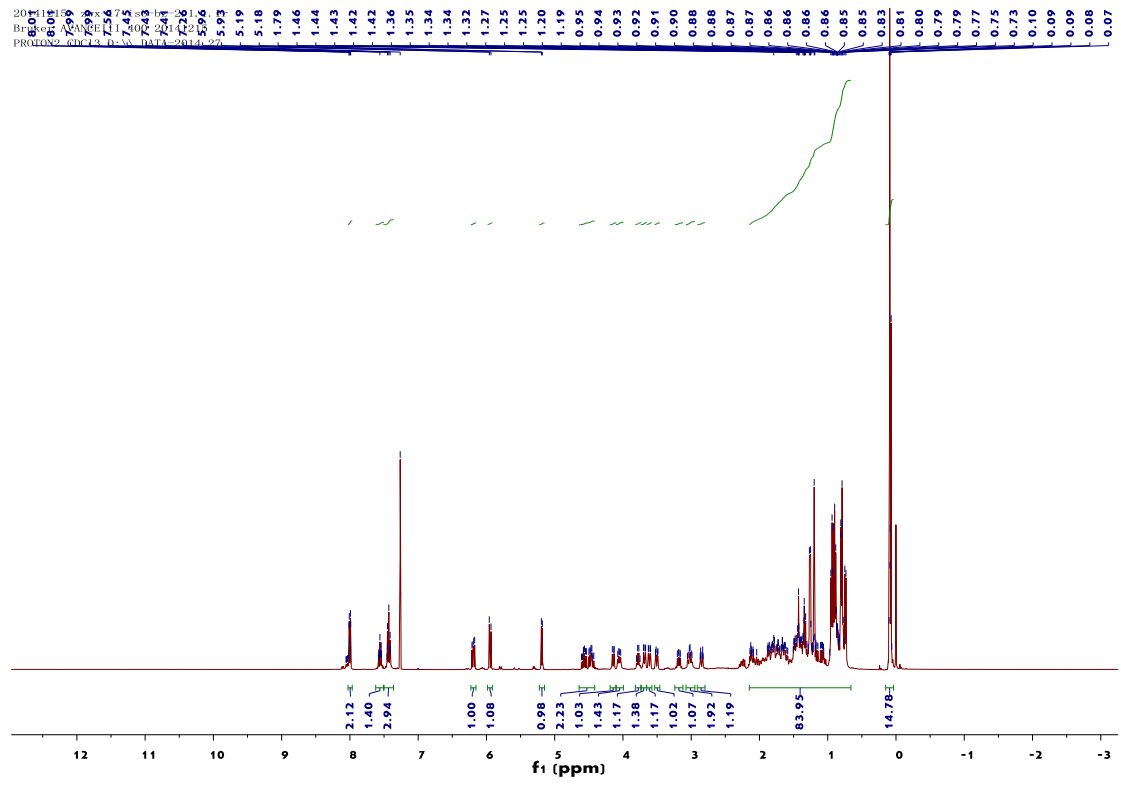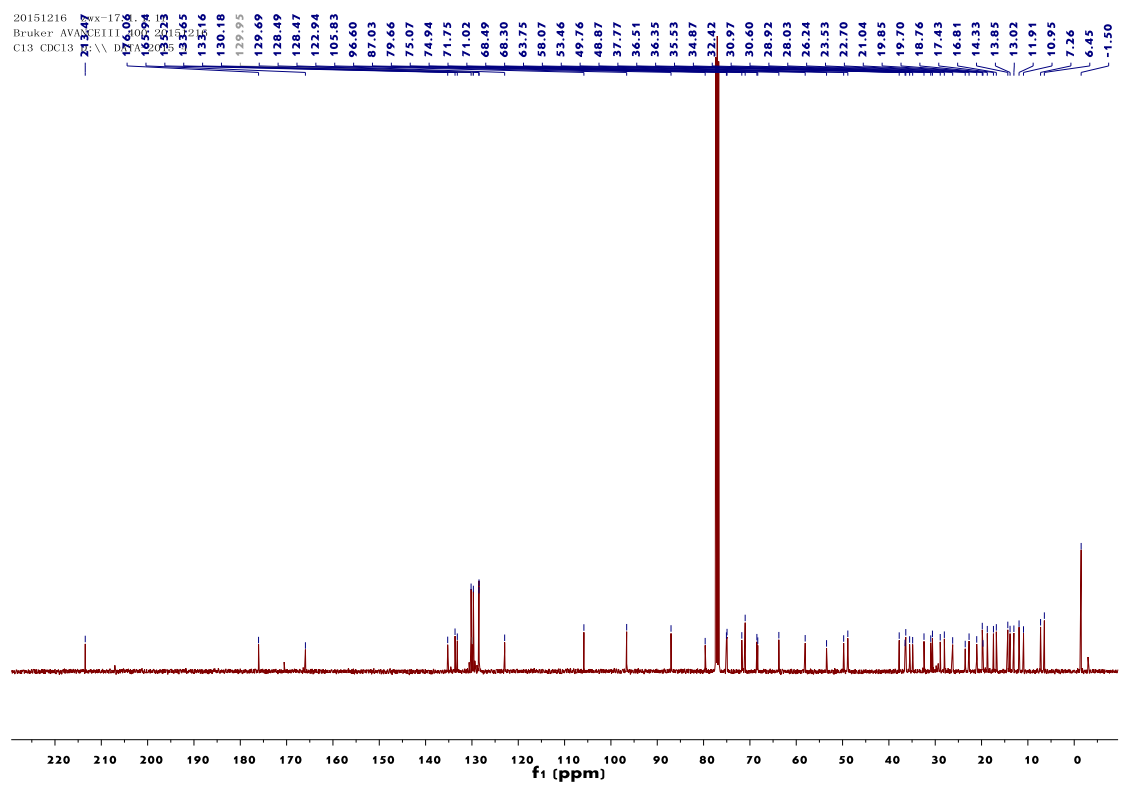

17-epi-20-O-Bz-salinomycin sodium salt (4)

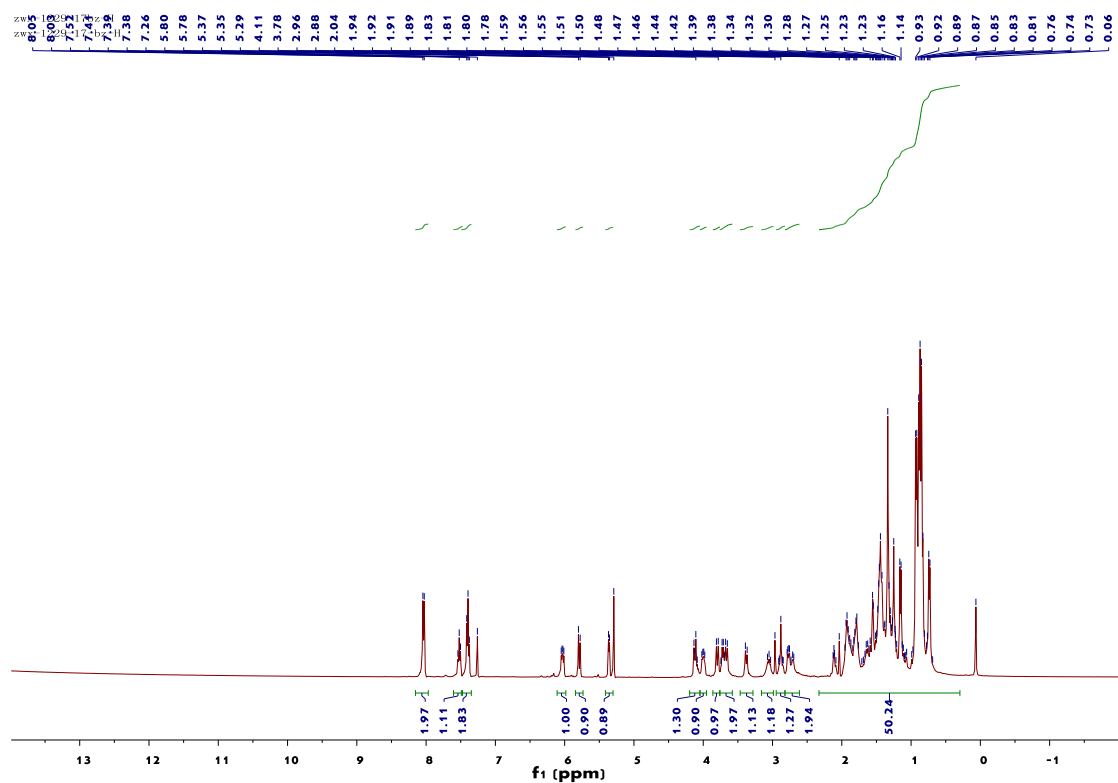

20150104 zwx-17epi-Bz.1.1.1r  
 Bruker AVANCEIII 400 20150104  
 C13-CDCl3 D:\DATA-2014 45

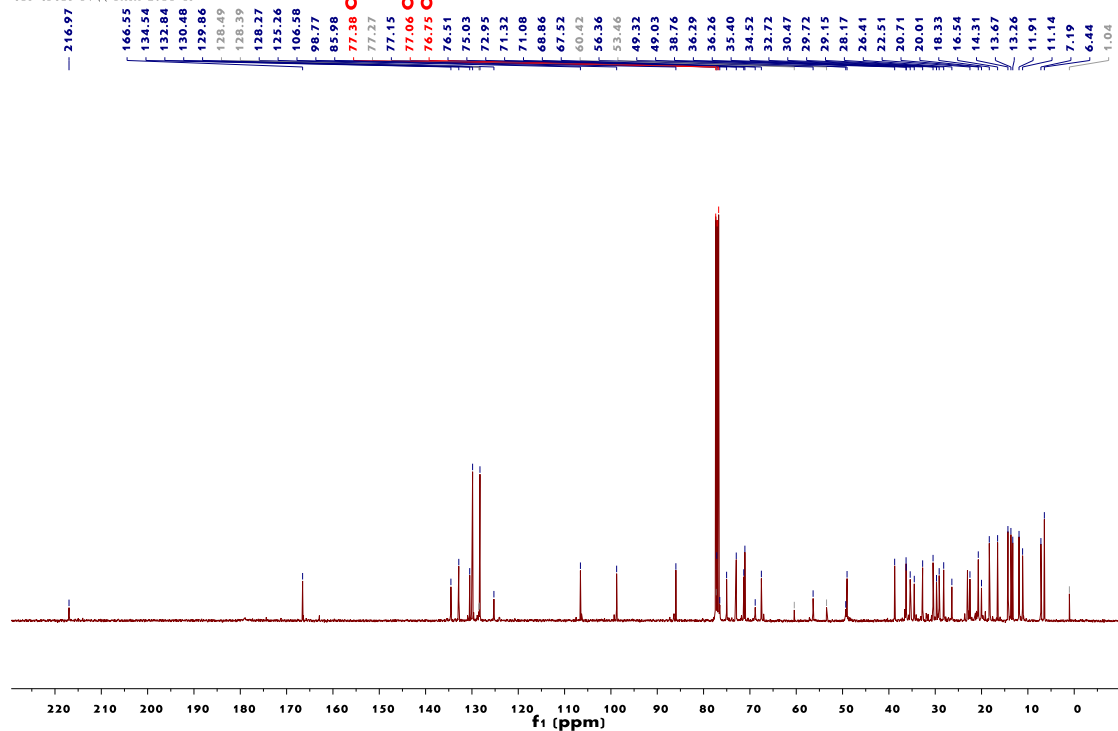

17,21-di-epi-20-O-Bz-salinomycin sodium salt (5)

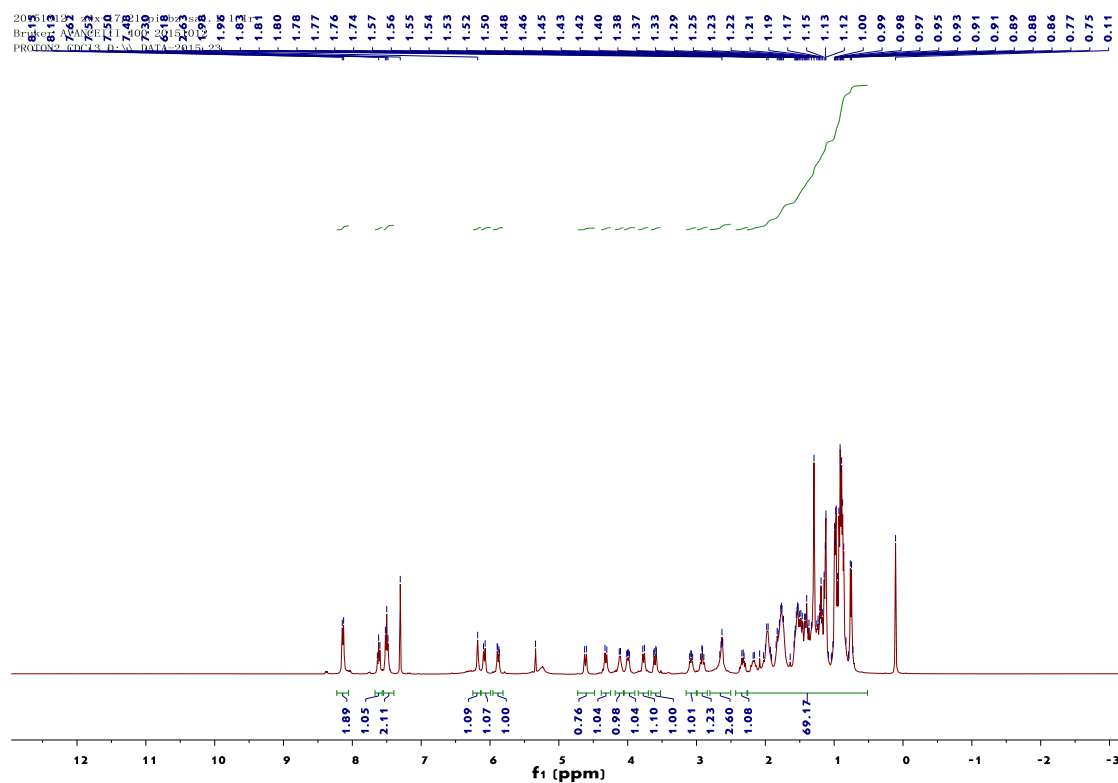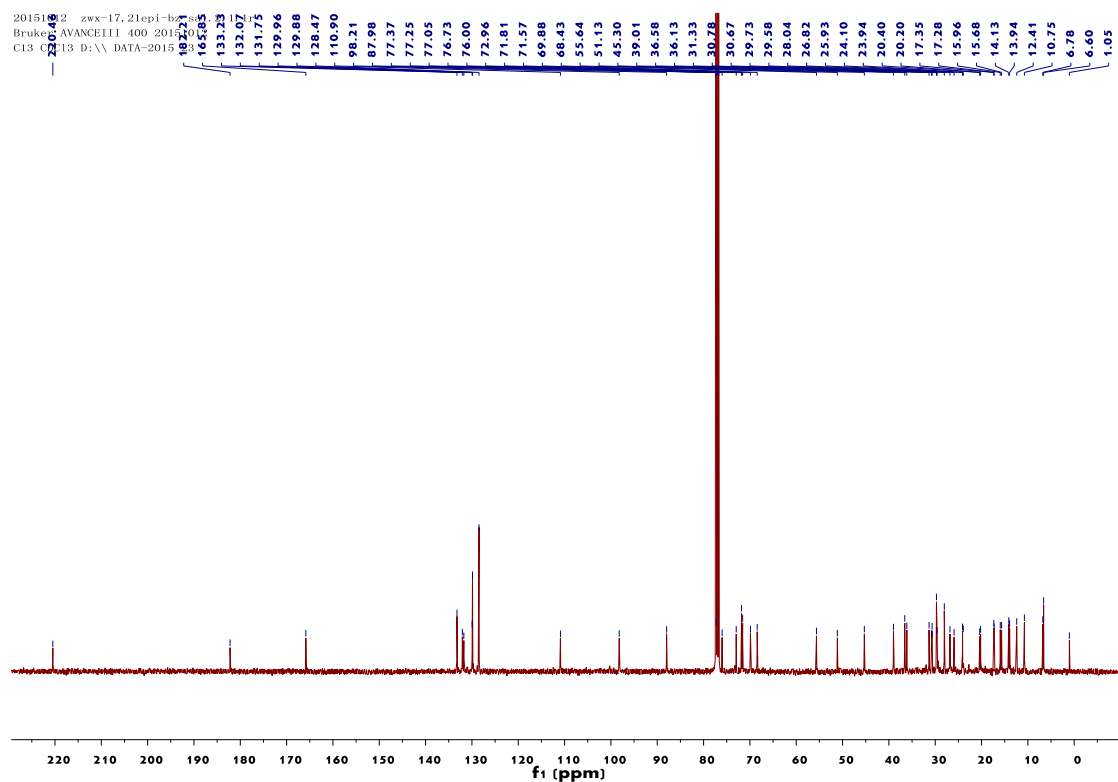

17-epi-salinomycin sodium salt (2)

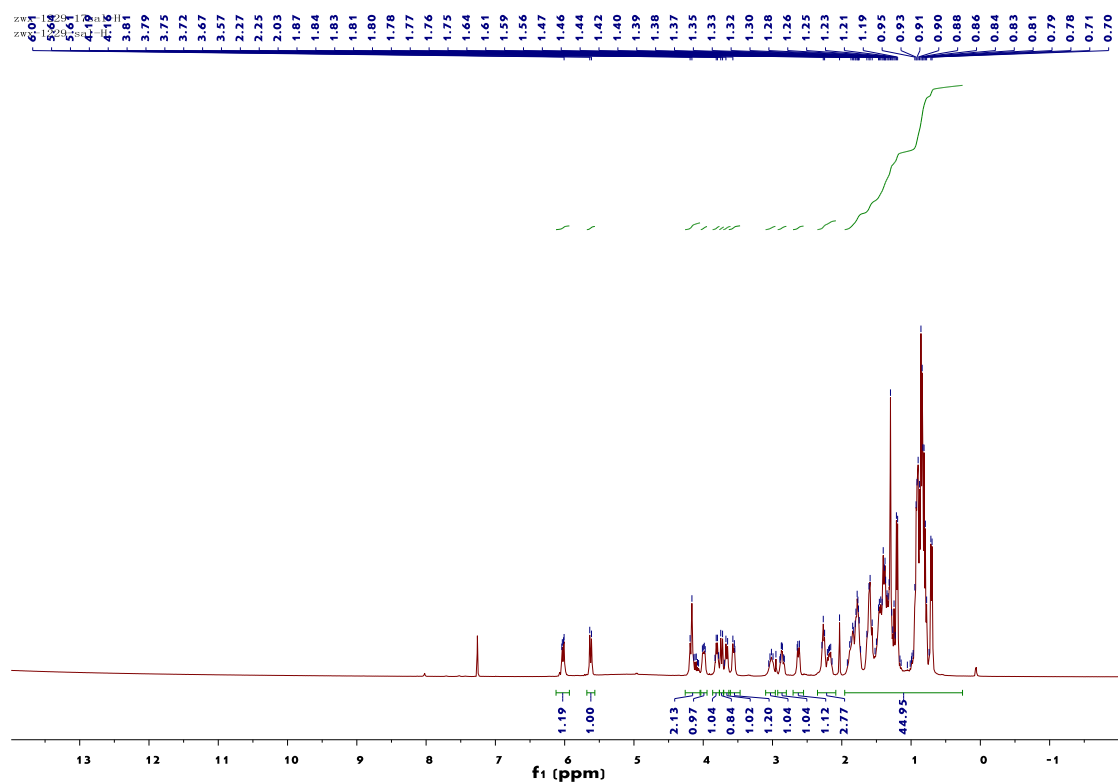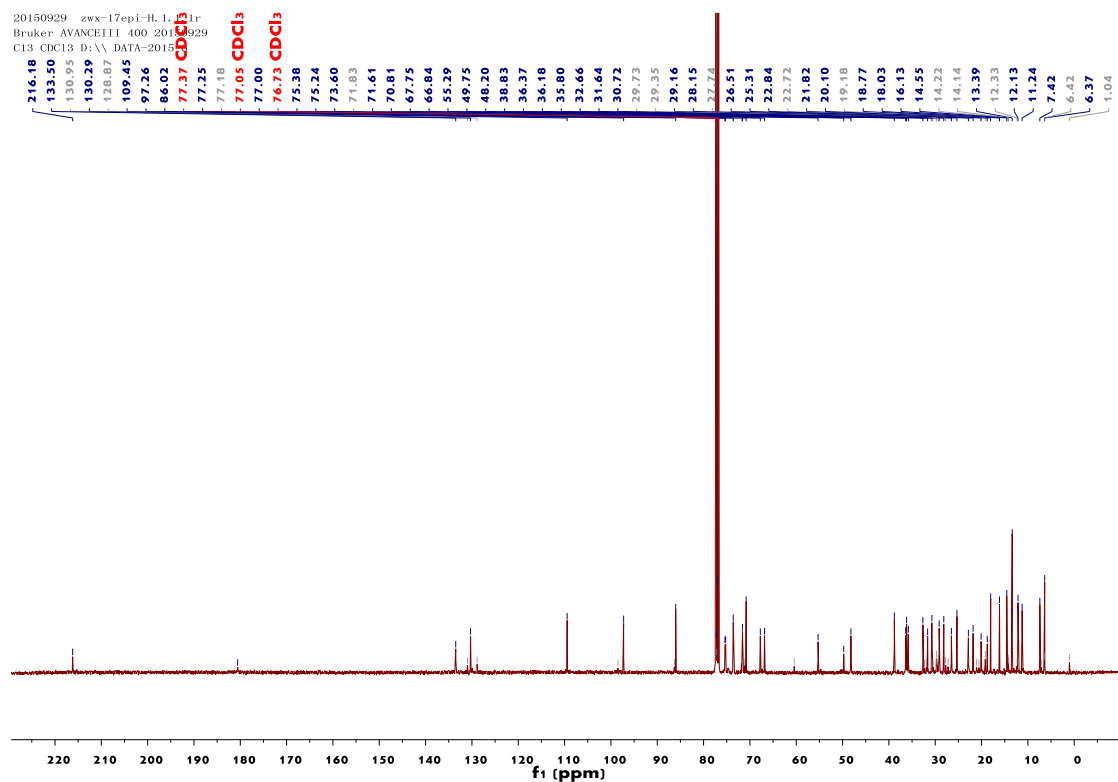

17, 21-di-epi-salinomycin sodium salt (3)

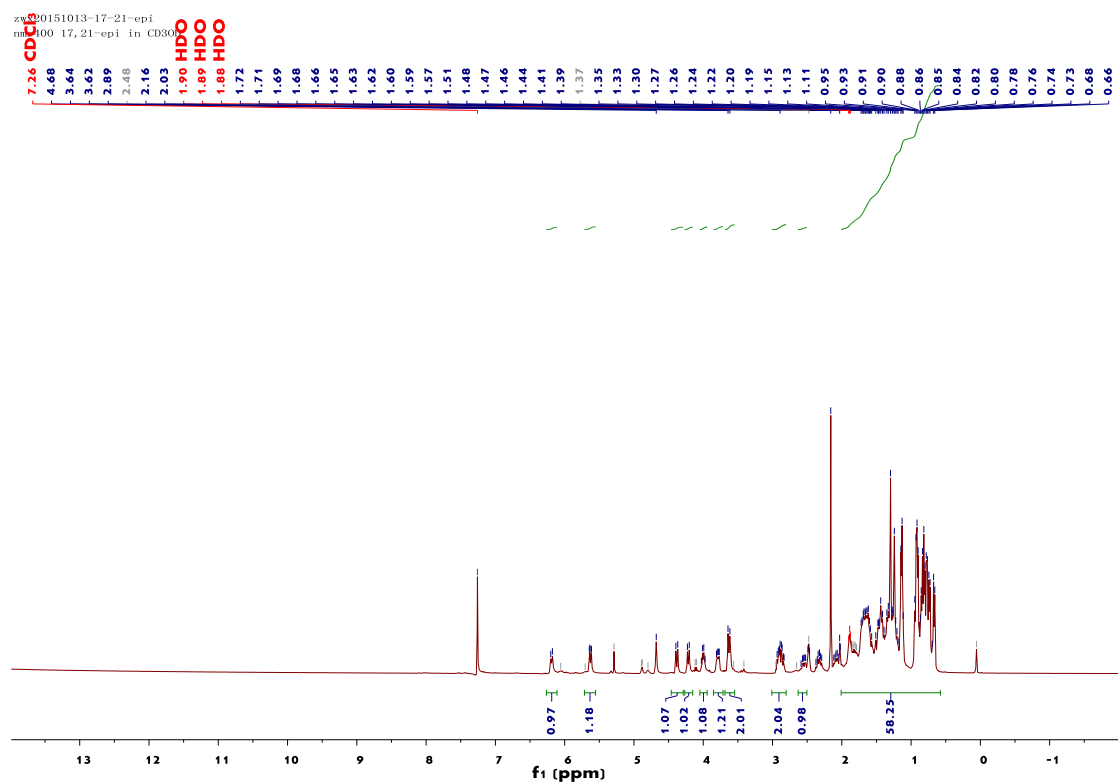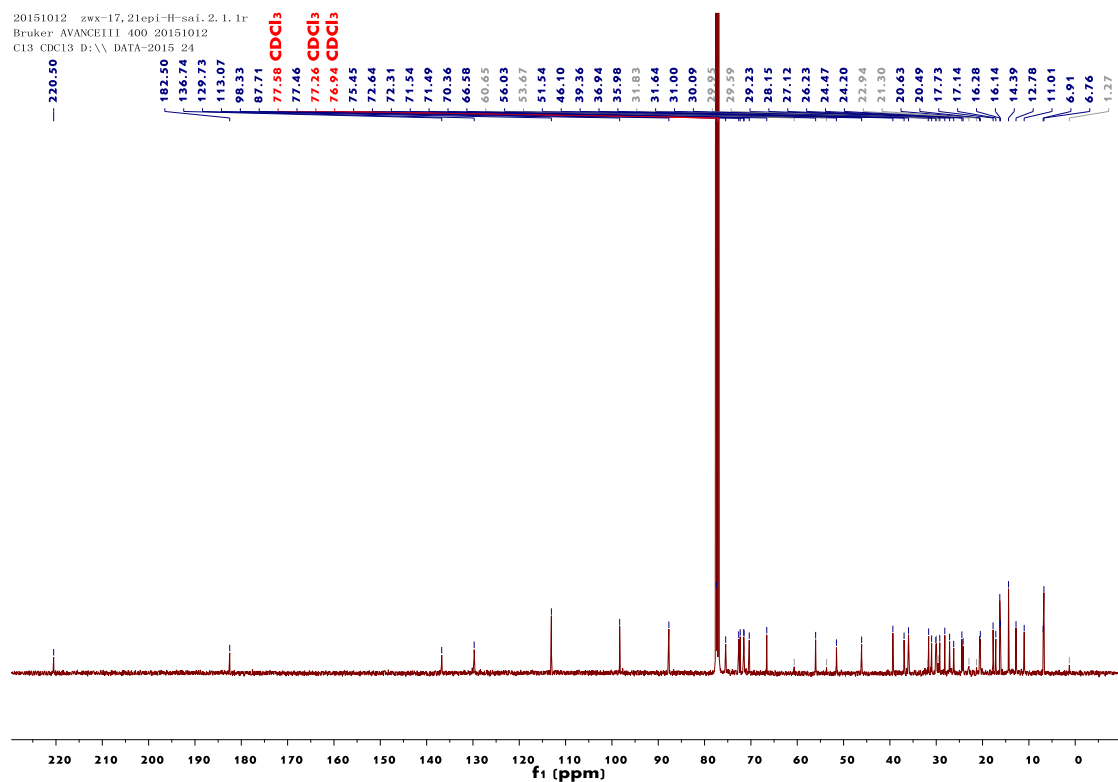

**Crystal data and structure refinement details of compound 9:**

A suitable crystal was selected and analyzed on a Xcalibur, Atlas, Gemini ultra diffractometer. The crystal was kept at 293(2) K during data collection. Using Olex2, the structure was solved with the Superflip structure solution program using Charge Flipping and refined with the ShelXL refinement package using Least Squares minimisation.

**Crystal Data** for  $C_{55}H_{88}O_{11}Si$  ( $M = 953.34$  g/mol): monoclinic, space group  $P2_1$  (no. 4),  $a = 12.1784(3)$  Å  $b = 10.4550(2)$  Å  $c = 22.4818(4)$  Å  $\alpha = 90.0000^\circ$   $\beta = 99.8798(18)^\circ$   $\gamma = 90.0000^\circ$   $V = 2820.05(10)$  Å<sup>3</sup>  $Z = 2$ ,  $\mu(\text{CuK}\alpha) = 0.803$  mm<sup>-1</sup>,  $D_{\text{calc}} = 1.123$  g/cm<sup>3</sup>, 41478 reflections measured ( $7.368^\circ \leq 2^\theta \leq 134.002^\circ$ ), 10003 unique ( $R_{\text{int}} = 0.0390$ ,  $R_{\text{sigma}} = 0.0221$ ) which were used in all calculations. The final  $R_1$  was 0.0447 ( $I > 2\sigma(I)$ ) and  $wR_2$  was 0.1313 (all data).

Atomic parameters:

| Atom | x/a        | y/b        | z/c          | U [Å <sup>2</sup> ] |
|------|------------|------------|--------------|---------------------|
| O1   | -0.7429(2) | -0.4023(2) | -0.58095(9)  |                     |
| O7   | -0.8458(2) | -0.5181(3) | -0.66126(9)  |                     |
| O41  | -0.5484(2) | -0.5023(2) | -0.97813(9)  |                     |
| O38  | -0.7989(2) | -0.3382(3) | -0.46195(9)  |                     |
| O18  | -0.6722(2) | -0.6807(2) | -0.86992(10) |                     |
| H18  | -0.60440   | -0.68960   | -0.86480     | 0.1080              |
| O28  | -0.7669(2) | 0.0078(2)  | -0.71355(10) |                     |
| O24  | -0.8571(2) | -0.2301(2) | -0.61603(10) |                     |
| O20  | -0.6904(3) | -0.4000(3) | -0.79542(11) |                     |
| O49  | -0.3543(3) | -0.4861(3) | -0.86019(11) |                     |
| C2   | -0.8111(4) | -0.5119(4) | -0.59784(14) |                     |
| O51  | -0.4361(2) | -0.6776(3) | -0.86476(12) |                     |
| O40  | -0.9389(3) | -0.2849(3) | -0.41476(12) |                     |
| C6   | -0.7921(3) | -0.2879(3) | -0.56473(14) |                     |
| C5   | -0.8704(3) | -0.3112(4) | -0.51975(15) |                     |
| H5   | -0.91470   | -0.23420   | -0.51620     | 0.0920              |
| C11  | -0.7611(3) | -0.5298(3) | -0.69843(13) |                     |
| H11  | -0.71740   | -0.45060   | -0.69510     | 0.0780              |
| C46  | -0.6173(3) | -0.6130(3) | -0.99444(12) |                     |
| H46  | -0.58030   | -0.68710   | -0.97300     | 0.0730              |
| C39  | -0.8452(4) | -0.3221(3) | -0.41287(15) |                     |
| C13  | -0.7640(3) | -0.4780(3) | -0.80978(14) |                     |
| C12  | -0.8234(3) | -0.5429(3) | -0.76432(13) |                     |
| H12  | -0.82600   | -0.63440   | -0.77400     | 0.0780              |
| C15  | -0.7025(3) | -0.5641(3) | -0.90184(12) |                     |
| H15  | -0.64000   | -0.50420   | -0.89260     | 0.0750              |
| C16  | -0.7248(3) | -0.5887(3) | -0.97073(13) |                     |
| H16  | -0.75830   | -0.51090   | -0.99030     | 0.0760              |
| C42  | -0.4391(3) | -0.5073(4) | -0.99249(15) |                     |
| H42  | -0.40670   | -0.42190   | -0.98470     | 0.0880              |
| C32  | -0.8695(3) | 0.0122(3)  | -0.81580(17) |                     |



|      |            |            |              |        |
|------|------------|------------|--------------|--------|
| C29  | -0.8191(3) | -0.1086(3) | -0.69893(15) |        |
| H29  | -0.77610   | -0.18080   | -0.71070     | 0.0830 |
| C60  | -0.7678(4) | -0.3542(3) | -0.35677(15) |        |
| C35  | -0.9293(3) | 0.1234(3)  | -0.80229(19) |        |
| H35A | -0.91430   | 0.13890    | -0.75960     | 0.1160 |
| H35B | -1.00780   | 0.10980    | -0.81510     | 0.1160 |
| H35C | -0.90590   | 0.19590    | -0.82310     | 0.1160 |
| C45  | -0.6303(3) | -0.6389(3) | -1.06252(13) |        |
| H45  | -0.66820   | -0.72140   | -1.07070     | 0.0840 |
| C47  | -0.3630(3) | -0.6011(4) | -0.95101(16) |        |
| H47  | -0.37950   | -0.68810   | -0.96620     | 0.0940 |
| C48  | -0.3888(3) | -0.5934(4) | -0.88814(16) |        |
| C14  | -0.8014(3) | -0.5089(4) | -0.87696(13) |        |
| H14  | -0.86090   | -0.57300   | -0.88100     | 0.0820 |
| C33  | -0.7542(3) | 0.0163(4)  | -0.77588(15) |        |
| H33  | -0.72330   | 0.10120    | -0.78130     | 0.0900 |
| C27  | -0.8092(4) | -0.1098(4) | -0.63073(16) |        |
| C3   | -0.9172(4) | -0.5094(5) | -0.57390(17) |        |
| H3   | -0.96760   | -0.57550   | -0.58510     | 0.1210 |
| C30  | -0.9361(3) | -0.1171(4) | -0.73425(17) |        |
| H30A | -0.98130   | -0.04880   | -0.72210     | 0.0940 |
| H30B | -0.96940   | -0.19810   | -0.72600     | 0.0940 |
| C4   | -0.9452(4) | -0.4209(5) | -0.53812(17) |        |
| H4   | -1.01260   | -0.42700   | -0.52420     | 0.1130 |
| C21  | -0.9456(3) | -0.4951(4) | -0.77461(16) |        |
| H21A | -0.94960   | -0.41790   | -0.75110     | 0.0970 |
| H21B | -0.96790   | -0.47290   | -0.81690     | 0.0970 |
| C31  | -0.9329(3) | -0.1064(4) | -0.80153(16) |        |
| H31A | -0.89740   | -0.18190   | -0.81460     | 0.0900 |
| H31B | -1.00850   | -0.10270   | -0.82380     | 0.0900 |
| C25  | -0.6960(4) | -0.1961(4) | -0.54315(16) |        |
| H25A | -0.71210   | -0.14250   | -0.51050     | 0.1000 |
| H25B | -0.62720   | -0.24230   | -0.52970     | 0.1000 |
| C17  | -0.8083(3) | -0.6970(4) | -0.98692(15) |        |
| H17A | -0.82640   | -0.70490   | -1.03000     | 0.1140 |
| H17B | -0.87480   | -0.67860   | -0.97090     | 0.1140 |
| H17C | -0.77630   | -0.77560   | -0.97000     | 0.1140 |
| C10  | -0.6825(4) | -0.6413(4) | -0.67906(16) |        |
| H10  | -0.72490   | -0.72060   | -0.68810     | 0.1050 |
| C26  | -0.6888(4) | -0.1174(4) | -0.59879(17) |        |
| H26A | -0.64240   | -0.15910   | -0.62400     | 0.1050 |
| H26B | -0.65910   | -0.03290   | -0.58790     | 0.1050 |

|      |            |            |              |        |
|------|------------|------------|--------------|--------|
| C64  | -0.7314(8) | -0.3668(6) | -0.24852(19) |        |
| H64  | -0.75480   | -0.35630   | -0.21160     | 0.1560 |
| C43  | -0.4436(4) | -0.5337(5) | -1.05920(16) |        |
| H43A | -0.36870   | -0.54730   | -1.06710     | 0.1050 |
| H43B | -0.47470   | -0.46000   | -1.08240     | 0.1050 |
| C65  | -0.8045(5) | -0.3403(4) | -0.30196(16) |        |
| H65  | -0.87700   | -0.31380   | -0.30090     | 0.1240 |
| C50  | -0.3734(4) | -0.4725(5) | -0.79751(18) |        |
| H50A | -0.35490   | -0.55170   | -0.77570     | 0.1170 |
| H50B | -0.45130   | -0.45350   | -0.79720     | 0.1170 |
| C44  | -0.5146(4) | -0.6511(4) | -1.07912(15) |        |
| H44A | -0.52150   | -0.66140   | -1.12250     | 0.1010 |
| H44B | -0.47820   | -0.72660   | -1.06000     | 0.1010 |
| C54  | -0.3023(4) | -0.3669(5) | -0.76795(18) |        |
| H54A | -0.32720   | -0.28750   | -0.78820     | 0.1130 |
| H54B | -0.22640   | -0.38170   | -0.77410     | 0.1130 |
| C8   | -0.7377(6) | -0.6269(5) | -0.57594(18) |        |
| H8   | -0.78340   | -0.70390   | -0.58510     | 0.1330 |
| C34  | -0.6715(3) | -0.0790(5) | -0.79158(17) |        |
| H34A | -0.60920   | -0.08410   | -0.75910     | 0.1300 |
| H34B | -0.64620   | -0.05240   | -0.82780     | 0.1300 |
| H34C | -0.70630   | -0.16140   | -0.79780     | 0.1300 |
| C61  | -0.6602(4) | -0.3964(4) | -0.35704(18) |        |
| H61  | -0.63480   | -0.40600   | -0.39350     | 0.1080 |
| C59  | -0.7002(4) | -0.5376(5) | -1.10077(15) |        |
| H59A | -0.77550   | -0.54120   | -1.09350     | 0.1370 |
| H59B | -0.69920   | -0.55350   | -1.14270     | 0.1370 |
| H59C | -0.66970   | -0.45440   | -1.09010     | 0.1370 |
| C62  | -0.5907(5) | -0.4242(5) | -0.3038(2)   |        |
| H62  | -0.51910   | -0.45450   | -0.30440     | 0.1290 |
| C36  | -0.8583(4) | 0.0208(5)  | -0.88194(18) |        |
| H36A | -0.81190   | 0.09390    | -0.88710     | 0.1070 |
| H36B | -0.81980   | -0.05510   | -0.89230     | 0.1070 |
| C23  | -0.5855(5) | -0.6443(6) | -0.7134(2)   |        |
| H23A | -0.61280   | -0.66280   | -0.75520     | 0.1700 |
| H23B | -0.53360   | -0.70930   | -0.69670     | 0.1700 |
| H23C | -0.54890   | -0.56270   | -0.71010     | 0.1700 |
| C57  | -0.2656(5) | -0.4965(5) | -0.6443(2)   |        |
| H57A | -0.32460   | -0.55710   | -0.65610     | 0.1610 |
| H57B | -0.25680   | -0.48190   | -0.60160     | 0.1610 |
| H57C | -0.19740   | -0.52960   | -0.65410     | 0.1610 |
| C19  | -0.8465(5) | -0.3870(5) | -0.91012(17) |        |

|      |             |              |              |        |
|------|-------------|--------------|--------------|--------|
| H19A | -0.90250    | -0.34990     | -0.89020     | 0.1570 |
| H19B | -0.87860    | -0.40760     | -0.95100     | 0.1570 |
| H19C | -0.78670    | -0.32710     | -0.91000     | 0.1570 |
| C37  | -0.8735(6)  | -0.0005(5)   | -0.6075(2)   |        |
| H37A | -0.95190    | -0.01240     | -0.62110     | 0.1730 |
| H37B | -0.85060    | 0.07940      | -0.62250     | 0.1730 |
| H37C | -0.85840    | 0.00030      | -0.56410     | 0.1730 |
| C9   | -0.6420(5)  | -0.6359(5)   | -0.61069(18) |        |
| H9A  | -0.59870    | -0.71200     | -0.59810     | 0.1330 |
| H9B  | -0.59370    | -0.56230     | -0.60120     | 0.1330 |
| C56  | -0.4383(4)  | -0.2849(6)   | -0.6718(3)   |        |
| H56A | -0.46040    | -0.21350     | -0.69800     | 0.1650 |
| H56B | -0.43290    | -0.25840     | -0.63050     | 0.1650 |
| H56C | -0.49270    | -0.35190     | -0.68030     | 0.1650 |
| C58  | -0.1914(5)  | -0.2257(5)   | -0.6576(2)   |        |
| H58A | -0.11940    | -0.26190     | -0.65900     | 0.1620 |
| H58B | -0.19590    | -0.20190     | -0.61690     | 0.1620 |
| H58C | -0.20230    | -0.15140     | -0.68310     | 0.1620 |
| C52  | -0.2397(4)  | -0.5729(6)   | -0.9525(2)   |        |
| H52A | -0.22920    | -0.56650     | -0.99420     | 0.1240 |
| H52B | -0.22010    | -0.49100     | -0.93340     | 0.1240 |
| C63  | -0.6261(7)  | -0.4078(6)   | -0.2503(2)   |        |
| H63  | -0.57780    | -0.42480     | -0.21450     | 0.1560 |
| C22  | -1.0271(4)  | -0.5922(6)   | -0.7575(2)   |        |
| H22A | -1.02460    | -0.66840     | -0.78110     | 0.1580 |
| H22B | -1.10100    | -0.55720     | -0.76530     | 0.1580 |
| H22C | -1.00720    | -0.61250     | -0.71540     | 0.1580 |
| Si55 | -0.30047(9) | -0.34503(10) | -0.68460(4)  |        |
| C1   | -0.9659(4)  | 0.0330(7)    | -0.9257(2)   |        |
| H1A  | -0.95020    | 0.04520      | -0.96570     | 0.1930 |
| H1B  | -1.00700    | 0.10500      | -0.91470     | 0.1930 |
| H1C  | -1.00920    | -0.04340     | -0.92460     | 0.1930 |
| C1AA | -0.1630(5)  | -0.6733(8)   | -0.9214(3)   |        |
| H1AA | -0.17880    | -0.75370     | -0.94170     | 0.2130 |
| H1AB | -0.17390    | -0.68120     | -0.88020     | 0.2130 |
| H1AC | -0.08720    | -0.64940     | -0.92220     | 0.2130 |
| C0AA | -0.6957(8)  | -0.6252(6)   | -0.5069(2)   |        |
| H0AA | -0.65460    | -0.54790     | -0.49600     | 0.2360 |
| H0AB | -0.64810    | -0.69760     | -0.49570     | 0.2360 |
| H0AC | -0.75820    | -0.62900     | -0.48610     | 0.2360 |
